# Supplementary material
Source: HighWire-hosted journal article supplement (https://www.annfammed.org/highwire/filestream/8866/field_highwire_adjunct_files/0/Panzer_Supp.pdf)
Supplement: Panzer_Supp.pdf [file Panzer_Supp.pdf]

Supplemental materials for:

Panzer J. Ordering labs as a team. *Ann Fam Med*. 2018;16(2):176.

**Acknowledgments:** Editorial support from Christine A. Sinsky, MD, FACP, VP of Professional Satisfaction at American Medical Association. The laboratory process improvement project would not have been successful without the efforts of Mark Kuhl, Jennifer Johnson, Nicolette Centeno, Gennady Gelman, MD and Tonya Idel, LPN.

## REFERENCES

1. McDonald CJ, Callaghan FM, Weissman A, Goodwin RM, Mundkur M, Kuhn T. Use of internist's free time by ambulatory care Electronic Medical Record systems. *JAMA Intern Med*. 2014;174(11):1860-1863. 10.1001/jamainternmed.2014.4506.
2. Sinsky C, Colligan L, Li L, et al. Allocation of physician time in ambulatory practice: a time and motion study in 4 specialties. *Ann Intern Med*. 2016;165(11):753-760. 10.7326/M16-0961.
3. Dweck C. What having a "growth mindset" actually means. *Harv Bus Rev*. <https://hbr.org/2016/01/what-having-a-growth-mindset-actually-means>. Published Jan 13, 2016. Accessed May 7, 2017.
